# Supplementary material
Source: PubMed Central journal article supplement (PMC7455676)
Supplement: 42770_2019_222_MOESM2_ESM.pdf [file 42770_2019_222_MOESM2_ESM.pdf]

| Isolate | Species                             | Mechanisms (HRM <sup>a</sup> )                          | APIVLAVYTR (IR <sup>b</sup> ) | LTLGSALAAPQR (IR <sup>b</sup> ) | GFLAAAVLAR (IR <sup>b</sup> ) | LALEGLGVNGQ (IR <sup>b</sup> ) |
|---------|-------------------------------------|---------------------------------------------------------|-------------------------------|---------------------------------|-------------------------------|--------------------------------|
| 4077F   | <i>Klebsiella pneumoniae</i>        | KPC <sup>c</sup> + NDM <sup>d</sup>                     | 0,00                          | 0,34                            | 0,31                          | 0,54                           |
| 4517F   | <i>Enterobacter cloacae</i> complex | KPC <sup>c</sup> + NDM <sup>d</sup>                     | 0,00                          | 1,54                            | 1,45                          | 1,45                           |
| 4521F   | <i>Klebsiella pneumoniae</i>        | KPC <sup>c</sup> + NDM <sup>d</sup>                     | 0,00                          | 0,79                            | 0,87                          | 0,81                           |
| 4815F   | <i>Klebsiella pneumoniae</i>        | KPC <sup>c</sup> + NDM <sup>d</sup>                     | 3,44                          | 0,67                            | 2,04                          | 0,49                           |
| 4945F   | <i>Providencia rettgeri</i>         | KPC <sup>c</sup> + GES <sup>e</sup>                     | 0,99                          | 0,35                            | 0,40                          | 0,50                           |
| 5176F   | <i>Citrobacter freundii</i>         | KPC <sup>c</sup>                                        | 0,00                          | 1,89                            | 1,56                          | 2,40                           |
| 5634F   | <i>Klebsiella pneumoniae</i>        | KPC <sup>c</sup>                                        | 5,08                          | 1,70                            | 1,55                          | 1,59                           |
| 5635F   | <i>Klebsiella pneumoniae</i>        | KPC <sup>c</sup>                                        | 10,54                         | 4,43                            | 3,14                          | 5,04                           |
| 5637F   | <i>Klebsiella pneumoniae</i>        | KPC <sup>c</sup>                                        | 2,15                          | 2,27                            | 1,78                          | 2,83                           |
| 5638F   | <i>Klebsiella pneumoniae</i>        | KPC <sup>c</sup>                                        | 11,86                         | 4,43                            | 3,41                          | 4,93                           |
| 5639F   | <i>Klebsiella pneumoniae</i>        | KPC <sup>c</sup>                                        | 10,37                         | 6,73                            | 4,58                          | 7,21                           |
| 5640F   | <i>Klebsiella pneumoniae</i>        | KPC <sup>c</sup>                                        | 1,92                          | 1,27                            | 0,82                          | 1,54                           |
| 5641F   | <i>Klebsiella pneumoniae</i>        | KPC <sup>c</sup>                                        | 81,10                         | 27,91                           | 22,14                         | 22,82                          |
| 5642F   | <i>Klebsiella pneumoniae</i>        | KPC <sup>c</sup>                                        | 3,13                          | 1,33                            | 1,11                          | 1,47                           |
| 5643F   | <i>Klebsiella pneumoniae</i>        | KPC <sup>c</sup>                                        | 2,75                          | 0,88                            | 0,93                          | 1,06                           |
| 5644F   | <i>Klebsiella pneumoniae</i>        | KPC <sup>c</sup>                                        | 0,00                          | 1,02                            | 0,83                          | 1,48                           |
| 5645F   | <i>Klebsiella pneumoniae</i>        | KPC <sup>c</sup>                                        | 0,54                          | 0,61                            | 0,53                          | 0,93                           |
| 5646F   | <i>Klebsiella pneumoniae</i>        | KPC <sup>c</sup>                                        | 38,87                         | 9,63                            | 8,00                          | 8,01                           |
| 5661F   | <i>Klebsiella pneumoniae</i>        | KPC <sup>c</sup>                                        | 4,19                          | 1,40                            | 3,18                          | 1,34                           |
| 5798F   | <i>Escherichia coli</i>             | KPC <sup>c</sup> + <i>mcr-1</i> <sup>f</sup>            | 1,56                          | 0,33                            | 0,80                          | 1,03                           |
| 6091F   | <i>Klebsiella pneumoniae</i>        | KPC <sup>c</sup>                                        | 0,00                          | 0,92                            | 0,80                          | 0,93                           |
| 6093F   | <i>Klebsiella pneumoniae</i>        | KPC <sup>c</sup>                                        | 2,79                          | 1,09                            | 0,91                          | 1,07                           |
| 6094F   | <i>Klebsiella pneumoniae</i>        | KPC <sup>c</sup>                                        | 0,00                          | 0,54                            | 0,65                          | 0,56                           |
| 6095F   | <i>Klebsiella pneumoniae</i>        | KPC <sup>c</sup>                                        | 0,00                          | 0,67                            | 0,37                          | 0,95                           |
| 6098F   | <i>Enterobacter cloacae</i> complex | KPC <sup>c</sup>                                        | 0,00                          | 0,16                            | 0,08                          | 0,16                           |
| 6100F   | <i>Klebsiella pneumoniae</i>        | KPC <sup>c</sup>                                        | 0,71                          | 0,56                            | 0,26                          | 0,58                           |
| 6101F   | <i>Klebsiella pneumoniae</i>        | KPC <sup>c</sup>                                        | 0,00                          | 0,35                            | 0,19                          | 0,39                           |
| 6102F   | <i>Klebsiella pneumoniae</i>        | KPC <sup>c</sup>                                        | 5,38                          | 1,85                            | 2,15                          | 1,58                           |
| 6104F   | <i>Klebsiella pneumoniae</i>        | KPC <sup>c</sup>                                        | 2,35                          | 1,79                            | 2,72                          | 1,60                           |
| 6105F   | <i>Klebsiella pneumoniae</i>        | KPC <sup>c</sup>                                        | 4,50                          | 1,17                            | 1,43                          | 0,83                           |
| 6170F   | <i>Enterobacter asburiae</i>        | KPC <sup>c</sup>                                        | 0,00                          | 0,86                            | 0,95                          | 0,84                           |
| 6354F   | <i>Klebsiella pneumoniae</i>        | KPC <sup>c</sup>                                        | 4,68                          | 1,63                            | 1,42                          | 1,77                           |
| 6355F   | <i>Klebsiella pneumoniae</i>        | KPC <sup>c</sup>                                        | 5,08                          | 1,70                            | 1,55                          | 1,59                           |
| 6356F   | <i>Klebsiella pneumoniae</i>        | KPC <sup>c</sup>                                        | 11,86                         | 4,43                            | 3,41                          | 4,93                           |
| 6357F   | <i>Klebsiella pneumoniae</i>        | KPC <sup>c</sup>                                        | 18,98                         | 4,40                            | 3,91                          | 2,01                           |
| 6421F   | <i>Klebsiella pneumoniae</i>        | KPC <sup>c</sup> + OXA <sup>g</sup> -48 <sup>like</sup> | 0,00                          | 0,71                            | 0,71                          | 0,72                           |
| 6482F   | <i>Enterobacter cloacae</i> complex | KPC <sup>c</sup> + NDM <sup>d</sup>                     | 0,00                          | 0,33                            | 0,28                          | 0,57                           |
| 6538F   | <i>Citrobacter freundii</i>         | KPC <sup>c</sup>                                        | 0,00                          | 0,81                            | 0,83                          | 1,06                           |
| 6694F   | <i>Klebsiella pneumoniae</i>        | KPC <sup>c</sup> + NDM <sup>d</sup>                     | 0,84                          | 0,30                            | 0,33                          | 0,47                           |
| 6699F   | <i>Escherichia coli</i>             | KPC <sup>c</sup> + <i>mcr-1</i> <sup>f</sup>            | 0,72                          | 0,64                            | 0,67                          | 1,01                           |
| 6738F   | <i>Serratia marcescens</i>          | KPC <sup>c</sup> + NDM <sup>d</sup>                     | 2,81                          | 1,42                            | 0,70                          | 3,10                           |
| 6740F   | <i>Escherichia coli</i>             | KPC <sup>c</sup>                                        | 0,00                          | 4,30                            | 3,57                          | 4,46                           |
| 6751F   | <i>Klebsiella pneumoniae</i>        | KPC <sup>c</sup> + OXA <sup>g</sup> -48 <sup>like</sup> | 0,00                          | 0,57                            | 0,52                          | 0,74                           |
| 6765F   | <i>Enterobacter cloacae</i> complex | KPC <sup>c</sup>                                        | 0,00                          | 0,74                            | 0,80                          | 0,74                           |
| 6769F   | <i>Escherichia coli</i>             | KPC <sup>c</sup>                                        | 0,51                          | 0,62                            | 0,57                          | 0,97                           |

|       |                                        |                  |      |      |      |      |
|-------|----------------------------------------|------------------|------|------|------|------|
| 6790F | <i>Enterobacter cloacae</i><br>complex | KPC <sup>c</sup> | 0,00 | 0,73 | 1,11 | 0,71 |
| 6795F | <i>Klebsiella oxytoca</i>              | KPC <sup>c</sup> | 0,00 | 0,74 | 0,79 | 0,70 |

<sup>a</sup>High Resolution Melting Real-Time PCR; <sup>b</sup>Intensity Ratio; <sup>c</sup>*Klebsiella pneumoniae* carbapenemase; <sup>d</sup>New-Dhelli Metallo- $\beta$ -lactamase; <sup>e</sup>Guiana-extended spectrum; <sup>f</sup>Mobile colistin resistance – 1; <sup>g</sup>Oxacillinase;
